# Supplementary material
Source: PubMed Central journal article supplement (PMC2857132)
Supplement: supp_M109.081554_jbc.M109.081554-1.pdf [file supp_M109.081554_jbc.M109.081554-1.pdf]

Pozzi et al., SUPPLEMENTARY INFORMATION

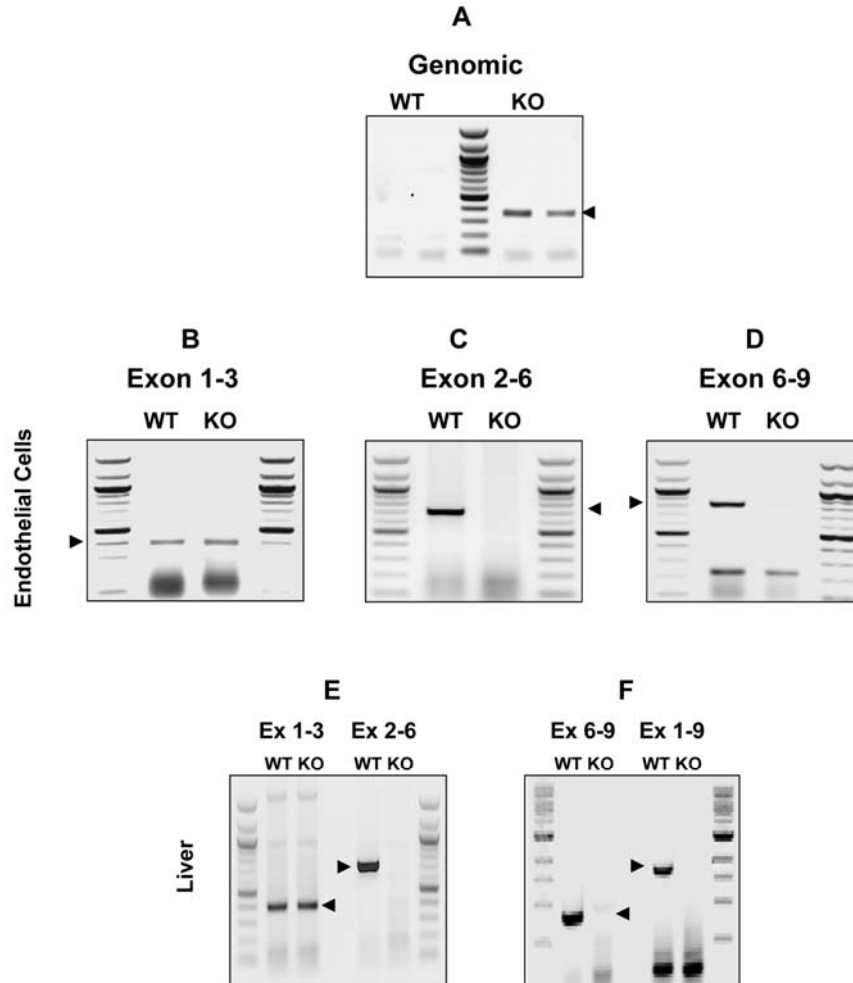

**Supplementary Figure 1: Characterization of *Cyp2c44*<sup>(-/-)</sup> mice by PCR amplification of genomic DNA and of DNAs reverse transcribed from endothelial cell and liver RNAs. (A):** PCR amplification of tail DNAs from wild type (WT) and *Cyp2c44*<sup>(-/-)</sup> (KO) mice using diagnostic PCR primers flanking the viral trap insertion site in exon 4, and the 3'-end of the trap (5'-ttacgactgagccacattcc-3' and 5'-ggcgttacttaagctagcttc) (350 bp). **(B-F):** PCR amplification of reverse transcribed RNAs from cultured lung endothelial cells and livers from WT and KO mice using PCR primers designed to amplify the following segments of the *Cyp2c44* mRNA: **B** and **E**: exon 1 to 3 (5'-gacatggagctgctgggtct-3' and 5'-ggagaagcgtcgcaggagtt-3') (398 bp); **C** and **E**: exon 2 to 6 (5'-ttggatcctggcctaccgtg-3' and tgtctctgtgcctgccgtaa-3')(680 bp); **D** and **F**: exon 6 to 9 (5'-cctgtcaagcatccagagg-3' and 5'-tgaagccacagaagagcacg-3') (822 bp); **F**: exon 1 to 9 (5'-gacatggagctgctgggtct-3' and 5'-atcgggtgcagtgtgctt-3') (1713 bp). The arrows indicate the mobility of each PCR product.

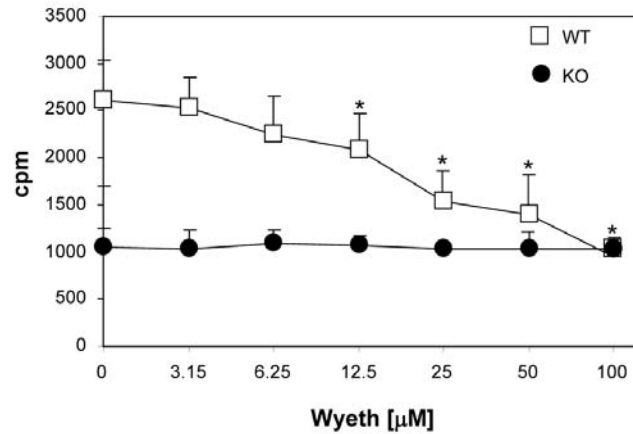

**Supplementary Figure 2: Wyeth fails to inhibit the proliferation of Cyp2c44 KO endothelial cells.** Micro-vascular endothelial cells, isolated from the lungs of WT or KO mice, were cultured in medium containing 2.5% FCS with or without Wyeth at the indicated concentrations. Two days later, the cells were incubated with [ $^3\text{H}$ ]thymidine (1  $\mu\text{C}/\text{well}$ ) and their proliferation determined as described in Methods. Values shown are averages  $\pm$  SD of 3 experiments performed in quadruplicate. (\*) indicates significant differences ( $p < 0.05$ ) between untreated and Wyeth-treated cells.

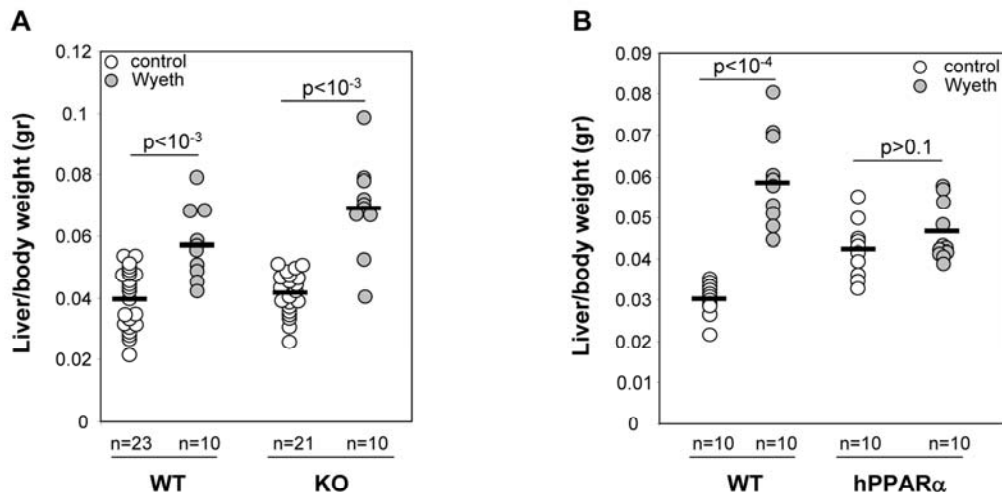

**Supplementary Figure 3: The administration of Wyeth causes liver hypertrophy in WT and Cyp2c44 KO, but not PPAR $\alpha$  humanized (hPPAR $\alpha$ ) mice. (A, B)** Groups of WT, KO, and hPPAR $\alpha$  mice were left untreated (control) or administered Wyeth (0.02% v/v) in their drinking water for a period of 16 days. The ratios of liver mass to body weight were used as estimates of the extent liver hypertrophy. Shown are individual liver/body weight ratio (circles) and averages (solid lines).

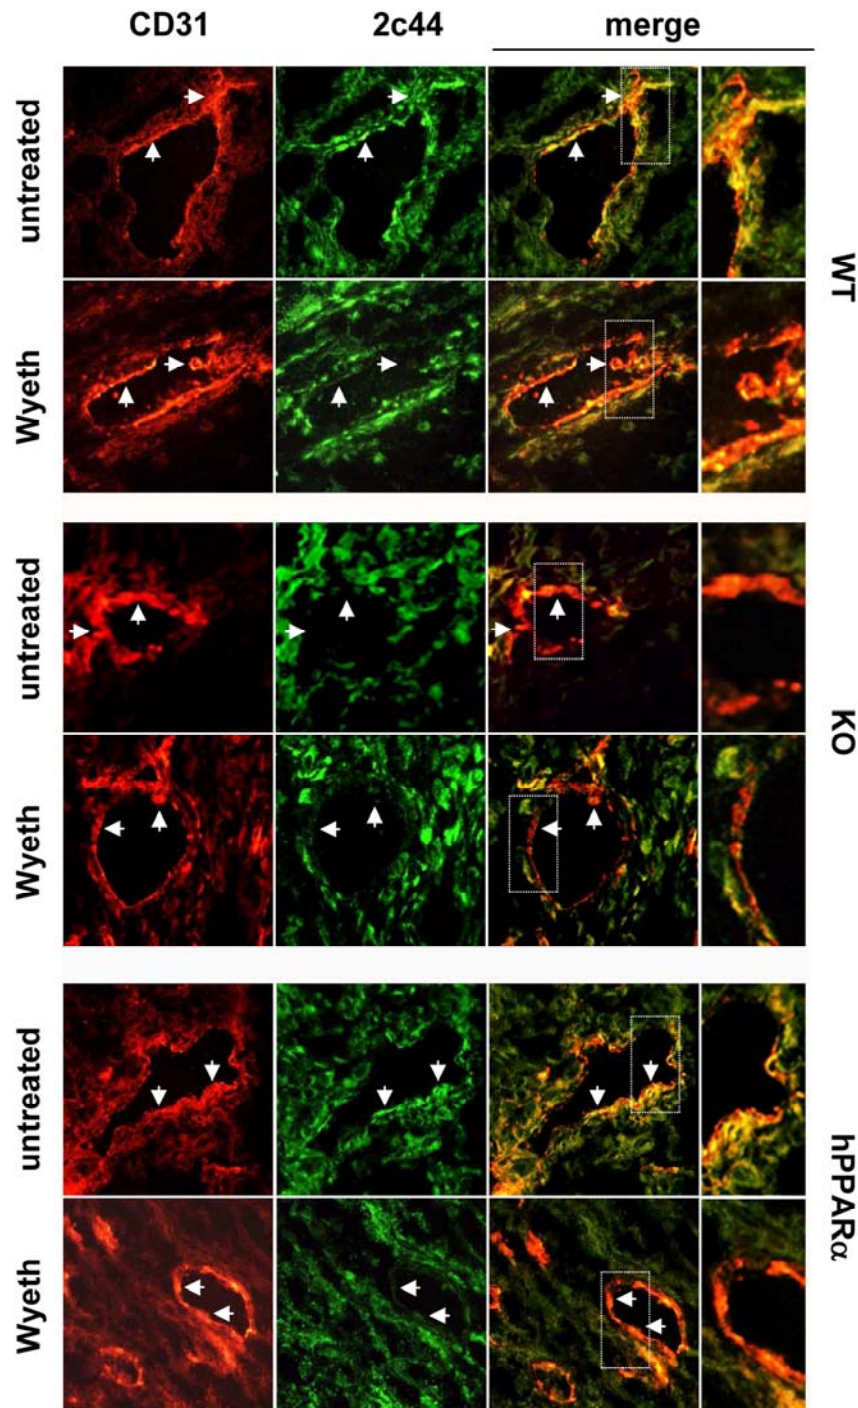

**Supplementary Figure 4: The administration of Wyeth causes down-regulation of endothelial Cyp2c44 in tumors from WT and PPAR $\alpha$  humanized (hPPAR $\alpha$ ) mice.** Frozen sections of tumors derived from the mice indicated were co-stained with rat anti-mouse CD31 (red) and rabbit anti-mouse Cyp2c44 (green). Images were subsequently merged to visualize endothelial expression of Cyp2c44 (yellow). Note that in tumors derived from untreated *Cyp2c44*<sup>-/-</sup> (KO) or Wyeth-treated WT, KO, and hPPAR $\alpha$  mice, Cyp2c44 staining is only and/or primarily localized to the tumor parenchyma (green). In contrast, in untreated WT and hPPAR $\alpha$  mice, Cyp2c44 staining is localized both in tumor (green) and endothelium (yellow).

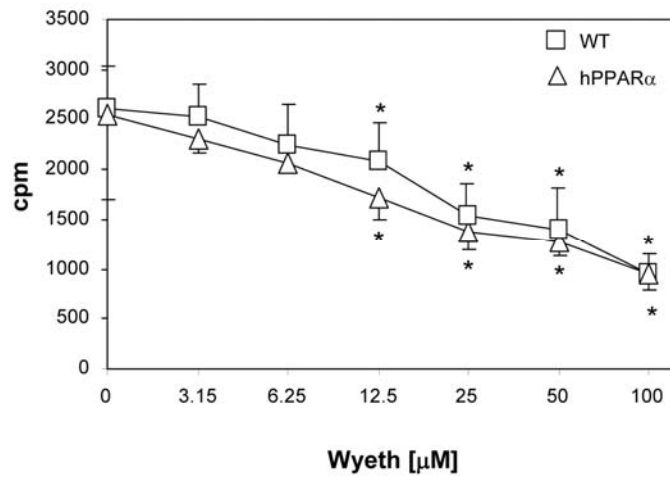

**Supplementary Figure 5: Wyeth inhibits the proliferation of PPAR $\alpha$  humanized (hPPAR $\alpha$ ) endothelial cells.** Micro-vascular endothelial cells, isolated from the lungs of WT or hPPAR $\alpha$  mice, were cultured in medium containing 2.5% FCS with or without Wyeth at the indicated concentrations. Two days later, the cells were incubated with [ $^3$ H]thymidine (1  $\mu$ C/well) and their proliferation determined as described in Methods. Values shown are averages  $\pm$  SD of 1 experiment performed in quadruplicate. (\*) indicates significant differences ( $p < 0.05$ ) between untreated and Wyeth-treated cells.

| Regioisomer      | Untreated              |                        | Wyeth-treated |           |
|------------------|------------------------|------------------------|---------------|-----------|
|                  | WT                     | KO                     | WT            | KO        |
| <b>8,9-EET</b>   | 2.0 ± 0.3 <sup>a</sup> | 2.2 ± 0.2 <sup>e</sup> | 0.8 ± 0.1     | 0.9 ± 0.2 |
| <b>11,12-EET</b> | 1.2 ± 0.3 <sup>b</sup> | 1.4 ± 0.2 <sup>f</sup> | 0.8 ± 0.3     | 0.7 ± 0.2 |
| <b>14,15-EET</b> | 1.9 ± 0.1 <sup>c</sup> | 1.8 ± 0.3 <sup>g</sup> | 1.2 ± 0.1     | 1.0 ± 0.2 |
| <b>TOTAL</b>     | 5.1 ± 0.3 <sup>d</sup> | 5.4 ± 0.2 <sup>h</sup> | 2.8 ± 0.5     | 2.6 ± 0.5 |

**Supplementary Table 1: Effects of Cyp2c44 gene disruption on the plasma EETs of untreated and Wyeth- treated mice.** Male wild type (WT) and *Cyp2c44*(-/-) KO mice were administered either water or an aqueous solution of Wyeth14,643 (0.02% w/v) as their source of drinking liquid. After 8-10 days, plasma samples were obtained by form EDTA collected blood, and the EETs extracted, purified, and quantified by LC/MS/MS as described in Methods. Values are given as ng of EET/ml of plasma, and are averages ± SE calculated from 4 different experiments. Significantly different between WT or KO untreated or Wyeth-treated with  $p \leq$  than: a, 0.02; b, 0.01; c, 0.01; d, 0.06; e, 0.04; f, 0.05; and g, 0.001. The differences between WT and KO either untreated or Wyeth-treated were non-significant ( $p > 0.05$ ).
